# Supplementary material for: Lightweight porous Co3O4 and Co/CoO nanofibers with tunable impedance match and configuration-dependent microwave absorption properties
Source: Royal Society of Chemistry journal article supplement (doi:10.1039/c7ce01464c), 2017-01-01
Supplement: c7ce01464c1.pdf [file c7ce01464c1.pdf]

# Lightweight porous $\text{Co}_3\text{O}_4$ and Co/CoO nanofibers with tunable impedance match and configuration-dependent microwave absorption properties

Biao Zhao,<sup>a, b, \*</sup> Jiushuai Deng,<sup>c</sup> Luyang Liang,<sup>a</sup> Chenyinxia Zuo,<sup>b</sup> Zhongyi Bai,<sup>a</sup>

Xiaoqin Guo,<sup>a</sup> Rui Zhang,<sup>a, \*</sup>

<sup>a</sup> Henan Key Laboratory of Aeronautical Materials and Application Technology, School of Mechatronics Engineering, Zhengzhou University of Aeronautics, Zhengzhou, Henan 450046, China

<sup>b</sup> Department of Mechanical and Industrial Engineering, University of Toronto, 5 King's College Road, Toronto, Ontario M5S 3G8, Canada

<sup>c</sup> State Key Laboratory of Complex Nonferrous Metal Resources Clean Utilization, Faculty of Land Resource Engineering, Kunming University of Science and Technology, Kunming 650093, China

**\* Corresponding Author:**

Dr. Biao Zhao

E-mail address: zhaobiao1813@163.com

Prof. Rui Zhang

E-mail address: zhangray@zzia.edu.cn

Tel: +86-371-60632007

Fax: +86-371-60632600

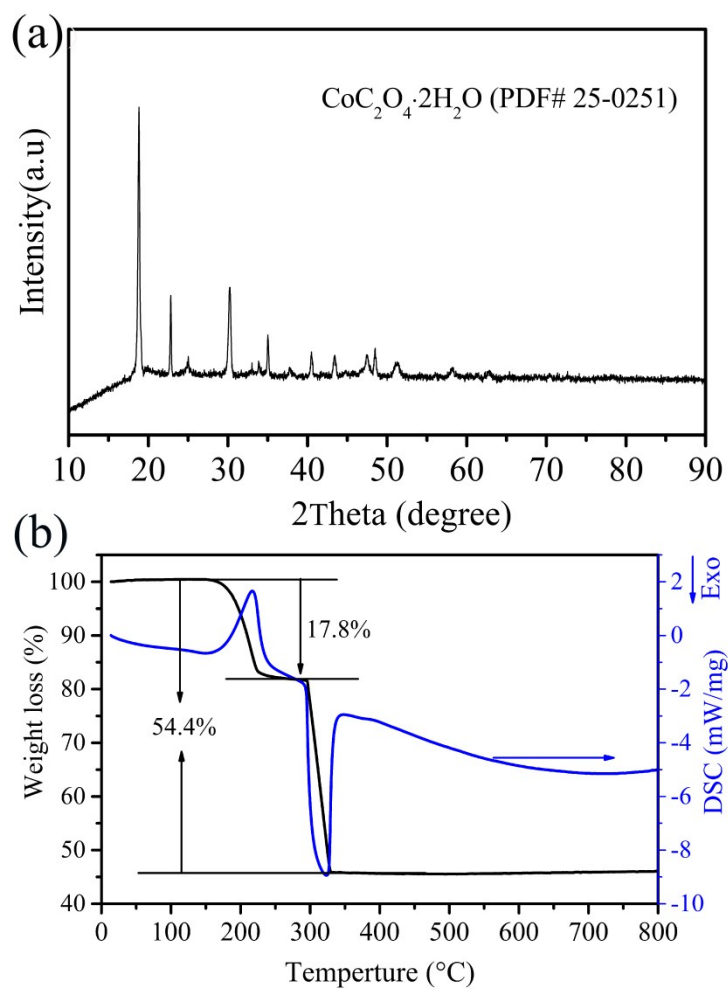

Figure S1 (a) XRD profile of precursor and (b) TG-DSC profile of  $\text{CoC}_2\text{O}_4$  precursor calcined in air atmosphere

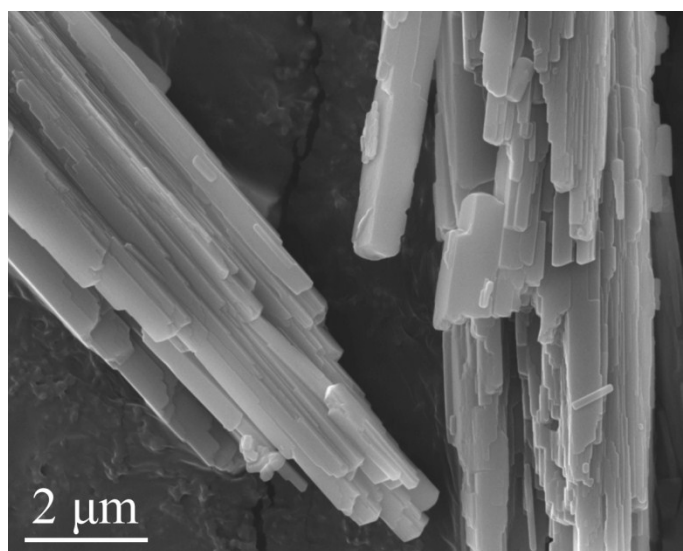

Figure S2 FESEM image of  $\text{CoC}_2\text{O}_4$  precursor

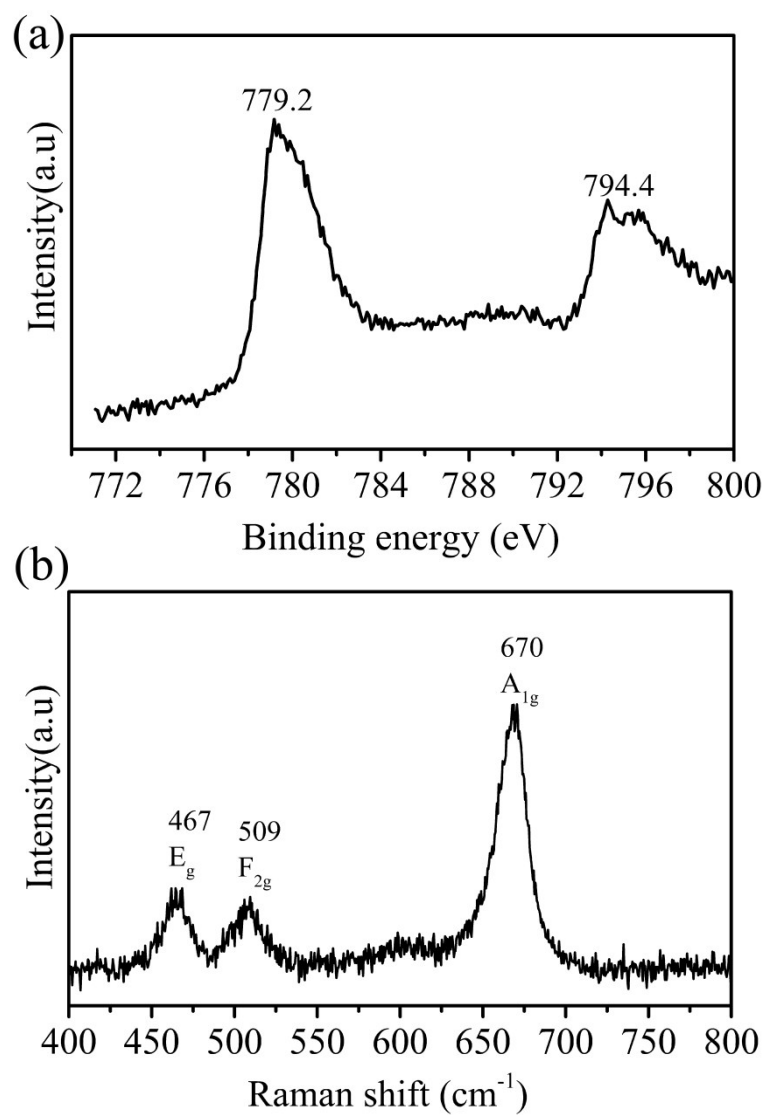

Figure S3 (a) High-resolution XPS core spectrum for Co 2p and (b) Raman pattern of S400 sample

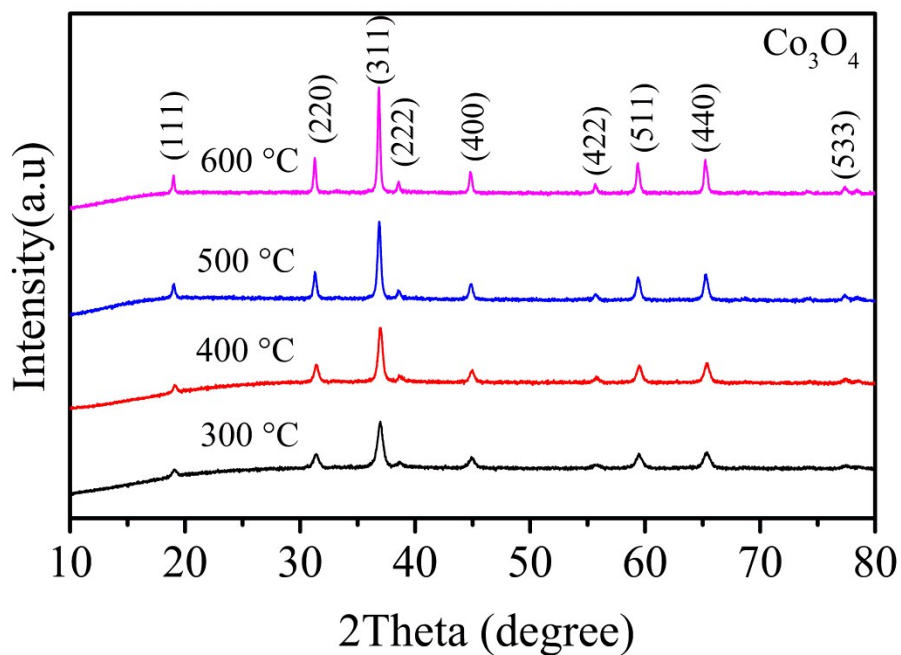

Figure S4 XRD patterns of porous  $\text{Co}_3\text{O}_4$  nanofibers fabricated at different calcination temperatures

Table S1 Textural characteristics (surface area, pore size, pore volume) of porous  $\text{Co}_3\text{O}_4$  nanofibers produced at different calcination temperature

| Sample | $S_{\text{BET}}$ ( $\text{m}^2/\text{g}$ ) | Pore volume)<br>( $\text{cm}^3/\text{g}$ ) | Average pore size<br>(nm) |
|--------|--------------------------------------------|--------------------------------------------|---------------------------|
| S300   | 57.86                                      | 0.273                                      | 18.4                      |
| S400   | 38.03                                      | 0.207                                      | 23.4                      |
| S500   | 26.50                                      | 0.126                                      | 21.7                      |
| S600   | 17.62                                      | 0.053                                      | 15.6                      |

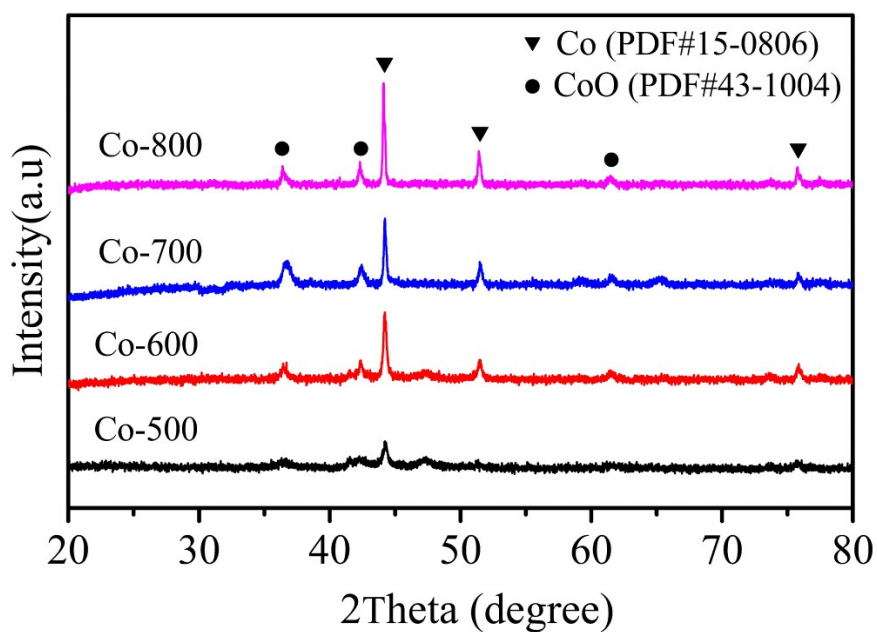

Figure S5 XRD curves of porous Co/CoO nanofibers prepared at different calcination temperatures under N<sub>2</sub> atmosphere

Table S2 Textural characteristics (surface area, pore size, pore volume) of porous Co<sub>3</sub>O<sub>4</sub> nanofibers produced at different calcination temperature

| Sample | S <sub>BET</sub> (m <sup>2</sup> /g) | Pore volume)<br>(cm <sup>3</sup> /g) | Average pore size<br>(nm) |
|--------|--------------------------------------|--------------------------------------|---------------------------|
| Co-500 | 25.01                                | 0.124                                | 19.0                      |
| Co-600 | 9.22                                 | 0.050                                | 21.3                      |
| Co-700 | 8.54                                 | 0.046                                | 21.0                      |
| Co-800 | 2.50                                 | 0.009                                | 12.8                      |

Table S3 Magnetic properties ( $M_s$ ,  $M_r$ ,  $H_c$ ) of Co/CoO samples produced at different temperature

| Sample | $M_s$ (emu/g) | $M_r$ (emu/g) | $H_c$ (Oe) |
|--------|---------------|---------------|------------|
| Co-500 | 47.6          | 18.5          | 65.7       |
| Co-600 | 62.0          | 7.7           | 20.4       |
| Co-700 | 62.2          | 4.5           | 4.2        |
| Co-800 | 145.7         | 1.4           | 4.1        |

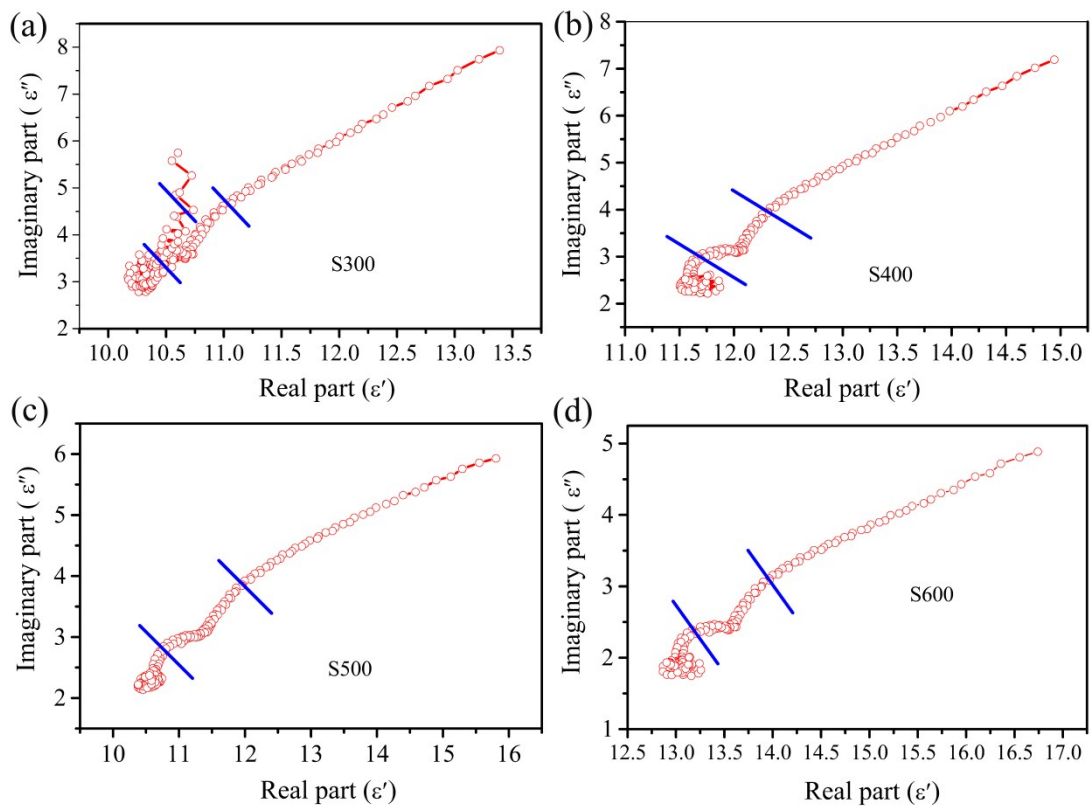

Figure S6 Cole– Cole plot of the  $\text{Co}_3\text{O}_4$ /paraffin composites: (a) S300, (b)S400, (c) S500 and (d) S600.

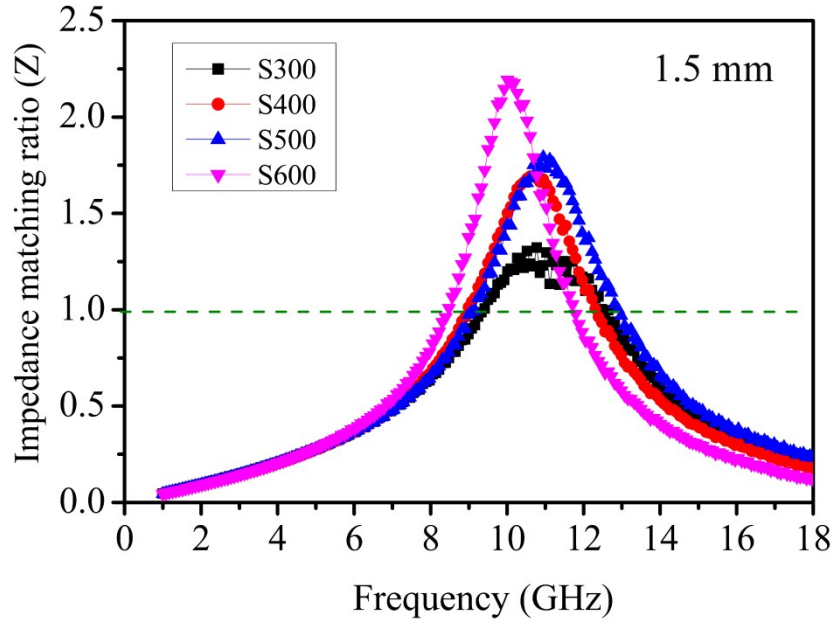

Figure S7 Modulus of impedance matching ratio  $Z$  ( $Z = Z_{in}/Z_0$ ) of various porous  $\text{Co}_3\text{O}_4$  samples with a thickness of 2.0 mm in the frequency range of 1–18 GHz.

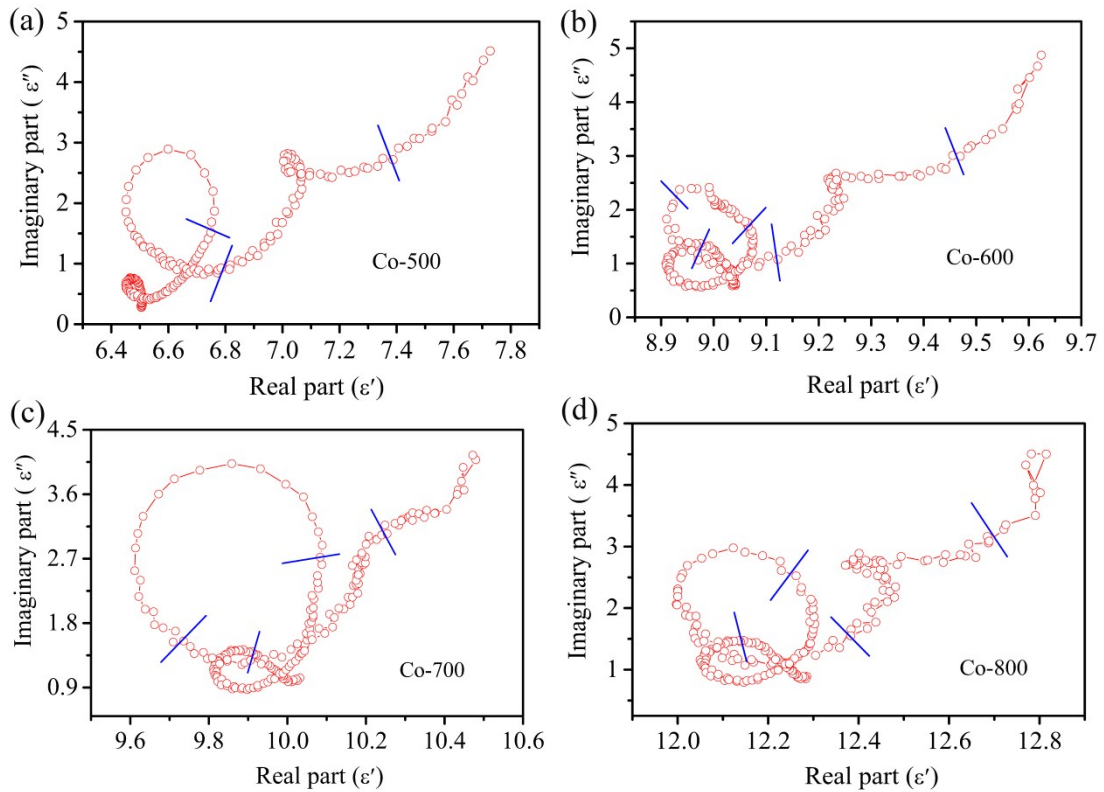

Figure S8 Cole– Cole plot of the Co/CoO paraffin-based composites: (a) Co-500, (b) Co-600, (c) Co-700 and (d) Co-800.

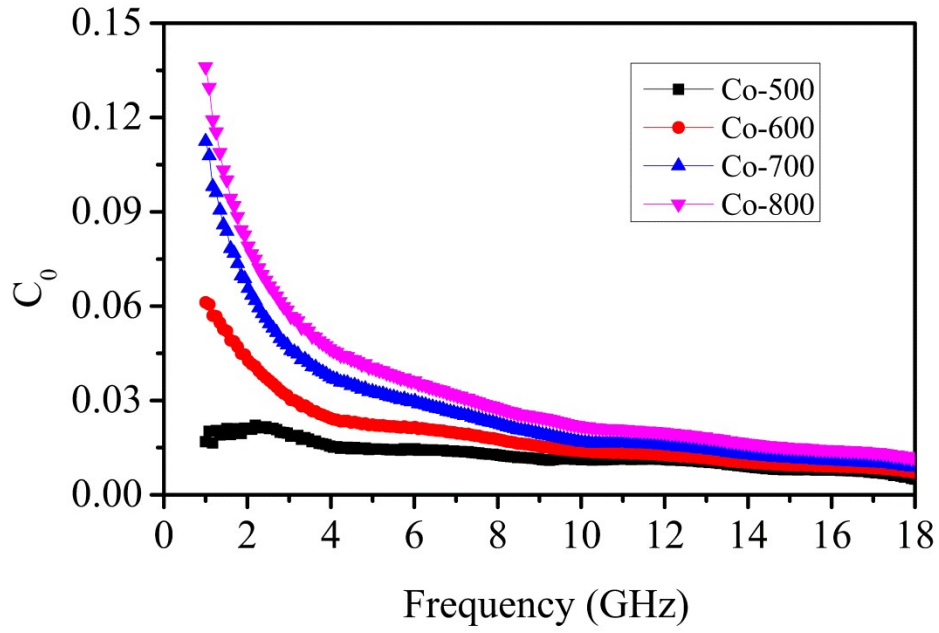

Figure S9 The value  $C_0 (\mu''(\mu')^{-2} f^{-1})$  as a function of frequency for porous Co/CoO nanofibers-paraffin composite

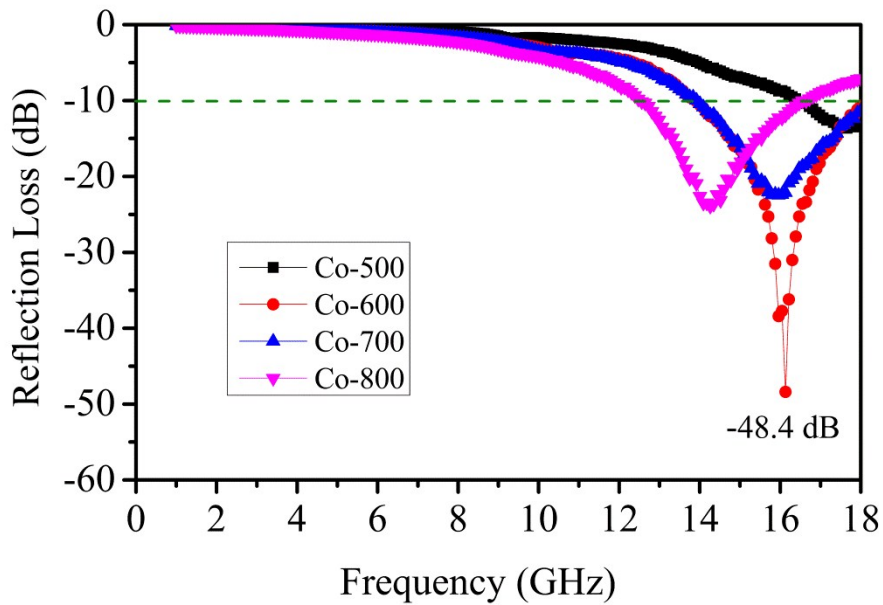

Figure S10 Reflection loss (RL) of various porous Co/CoO nanofibers with a thickness of 1.5 mm in the frequency range of 1–18 GHz.



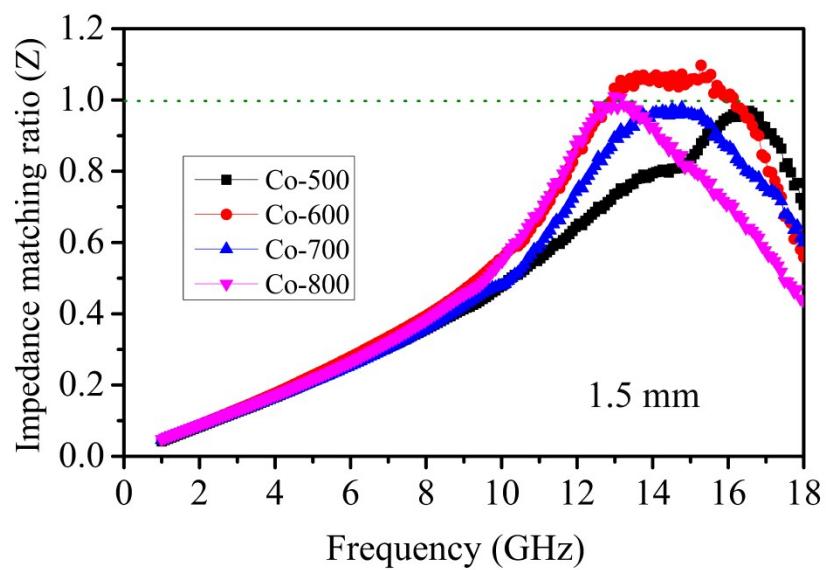

Figure S11 Modulus of impedance matching ratio  $Z$  ( $Z = Z_{in}/Z_0$ ) of various porous Co/CoO nanofibers samples with a thickness of 1.5 mm in the frequency range of 1–18 GHz
